# Supplementary material
Source: PubMed Central journal article supplement (PMC2685449)
Supplement: neo1106_0605SD1.pdf [file neo1106_0605SD1.pdf]

**Table W1.** Primer Sequences and Product Size.

| Primer Name | Sequence                    | Product Size (bp) |
|-------------|-----------------------------|-------------------|
| ANXA11-F    | 5'-cggcagcagatcctacttcc-3'  | 185               |
| ANXA11-R    | 5'-atcaggcaggcttcacagt-3'   |                   |
| HMOX1-F     | 5'-atgacaccaaggaccagagc-3'  | 153               |
| HMOX1-R     | 5'-gtgtaaggacccatcggaga-3'  |                   |
| TGFBI-F     | 5'-gtgtgtgtgtgtgcagaaggt-3' | 172               |
| TGFBI-R     | 5'-ttgagatggttagggctgct-3'  |                   |
| LY6D-F      | 5'-cttctgcaagaccagaaca-3'   | 154               |
| LY6D-R      | 5'-ctcattgacaggtcctcct-3'   |                   |
| S100P-F     | 5'-taccaggctctgcagagt-3'    | 177               |
| S100P-R     | 5'-ctccaggcatcattttagt-3'   |                   |
| EIF4EBP2-F  | 5'-gttgggatggtctcagtt-3'    | 153               |
| EIF4EBP2-R  | 5'-ctgtaattgggactctgggt-3'  |                   |
| DHRS2-F     | 5'-gccctacatggagaacagga-3'  | 217               |
| DHRS2-R     | 5'-accaatcctcaccatttgc-3'   |                   |
| PCSK9-F     | 5'-accctcatagcctggagt-3'    | 188               |
| PCSK9-R     | 5'-gagttagaggcaggcatcgtc-3' |                   |
| GAPDH-F     | 5'-ccaggctctttaaact-3'      | 186               |
| GAPDH-R     | 5'-ctcgtcctggaagata-3'      |                   |

**Table W2.** Validation of DNA Microarray Data Using Real-time PCR.

| Gene            |      | R1/N1        | R2/N2        | R3/N3        | R4/N4        | N2/N1        | N3/N1        | N4/N1        | R2/R1        | R3/R1        | R4/R1        |
|-----------------|------|--------------|--------------|--------------|--------------|--------------|--------------|--------------|--------------|--------------|--------------|
| <i>ANXA11</i>   | Chip | -3.12        | -3.55        | -3.56        | -3.52        | +1.17        | +1.12        | +1.00        | +1.03        | -1.02        | -1.15        |
|                 | PCR  | -3.16        | -3.81        | -3.26        | -3.67        | -1.05        | -1.09        | -1           | -1.27        | -1.13        | -1.16        |
|                 | P    | <u>.0226</u> | <u>.004</u>  | <u>.0159</u> | <u>.0139</u> | .4164        | .3645        | .5           | .1776        | .3221        | .2891        |
| <i>HMOX1</i>    | Chip | +5.53        | +4.64        | +4.54        | +5.13        | +1.17        | +1.12        | -1.40        | -1.02        | -1.09        | -1.33        |
|                 | PCR  | +6.28        | +6.23        | +6.34        | +3.06        | +1.12        | -1.3         | -1.09        | +1.11        | -1.28        | -2.24        |
|                 | P    | <u>.0121</u> | <u>.0041</u> | <u>.0192</u> | <u>.0349</u> | .3403        | .1998        | .3963        | .283         | .189         | <u>.0265</u> |
| <i>TGFBI</i>    | Chip | +2.78        | +3.04        | +3.61        | +3.34        | -1.29        | -1.36        | -1.18        | -1.18        | -1.05        | +1.01        |
|                 | PCR  | +2.6         | +3.94        | +3.72        | +3.8         | -1.86        | -1.81        | -1.54        | -1.23        | -1.26        | -1.05        |
|                 | P    | <u>.0131</u> | <u>.0045</u> | <u>.0076</u> | <u>.0056</u> | <u>.0285</u> | <u>.0317</u> | .0553        | .1355        | .142         | .3713        |
| <i>LY6D</i>     | Chip | +5.08        | +5.20        | +3.21        | +2.83        | -1.26        | +1.47        | +1.91        | -1.23        | -1.08        | +1.07        |
|                 | PCR  | +5.31        | +5.75        | +3.22        | +2.7         | -1.67        | +1.17        | +1.57        | -1.34        | -1.23        | -1.09        |
|                 | P    | <u>.032</u>  | <u>.0047</u> | <u>.0089</u> | <u>.0134</u> | <u>.0486</u> | .1927        | .0559        | .0855        | .1472        | .3175        |
| <i>S100P</i>    | Chip | +2.35        | +2.99        | +3.22        | +3.03        | -1.48        | -2.55        | -2.09        | -1.17        | -1.86        | -1.62        |
|                 | PCR  | +3.14        | +3.1         | +3.02        | +2.83        | -1.34        | -2.24        | -2.07        | -1.36        | -2.33        | -2.29        |
|                 | P    | <u>.016</u>  | <u>.0071</u> | <u>.0057</u> | <u>.0235</u> | .1242        | <u>.0282</u> | <u>.0286</u> | .0603        | <u>.0097</u> | <u>.0157</u> |
| <i>EIF4EBP2</i> | Chip | -2.48        | -2.30        | -2.17        | -2.25        | +1.14        | +1.01        | -1.06        | +1.23        | +1.16        | +1.04        |
|                 | PCR  | -2.83        | -2.17        | -1.81        | -1.72        | +1.01        | -1.22        | -1.3         | +1.31        | +1.28        | +1.27        |
|                 | P    | <u>.0041</u> | <u>.0041</u> | <u>.0296</u> | <u>.0318</u> | .4608        | .1397        | .0836        | <u>.0259</u> | .0581        | .1135        |
| <i>DHRS2</i>    | Chip | -1.67        | -1.45        | -1.03        | +1.01        | -1.37        | -3.52        | -5.41        | -1.18        | -2.17        | -3.21        |
|                 | PCR  | -1.67        | -1.34        | -1.04        | -1.3         | -1.58        | -5.55        | -8.82        | -1.27        | -3.44        | -6.87        |
|                 | P    | .0735        | .0852        | .4102        | .0773        | .0777        | <u>.0068</u> | <u>.0089</u> | .1825        | <u>.0398</u> | <u>.0103</u> |
| <i>PCSK9</i>    | Chip | +1.64        | +2.01        | +1.22        | +1.36        | -1.99        | +2.79        | +3.74        | -1.62        | +2.07        | +3.11        |
|                 | PCR  | -1.05        | +1.36        | +1           | +1.34        | -2.66        | +2.17        | +2.25        | -1.87        | +2.28        | +3.16        |
|                 | P    | .3917        | .0773        | .4919        | .0689        | <u>.0139</u> | <u>.0223</u> | <u>.0179</u> | <u>.0242</u> | <u>.0118</u> | <u>.0065</u> |

*P* values are shown for the real-time PCR assays. Differences with *P* < .05 were considered statistically significant (in boldface). *P* values with underline represent validated gene alterations in both chip and PCR platforms, but *P* values without underline represent statistically significant gene alterations only in PCR platform.
